# Supplementary material for: Thermally-actuated, phase change flow control for microfluidic systems
Source: Royal Society of Chemistry journal article supplement (doi:10.1039/b508275g), 2005-01-01
Supplement: b508275g.pdf [file b508275g.pdf]

## Thermally-Actuated, Phase-Change Flow Control for Microfluidic Systems

Zongyuan Chen, Jing Wang, Shizhi Qian, and Haim H. Bau\*  
Department of Mechanical Engineering and Applied Mechanics  
University of Pennsylvania, Philadelphia, PA 19104-6315, USA

### Supplemental Materials

#### 1. Videos:

- Sample distribution and metering – the video describes the sample distribution into four metering chambers. When the sample arrives at the downstream, pre-cooled valve, it freezes and blocks the passage
- Filling and emptying a closed loop

#### 2. The Temperature of the Thermoelectric Unit in Contact with the Chip

Measurements of the temperature of the interface between the thermoelectric unit (HOT 2.0-30-F2A, Melcor, NJ) and the polycarbonate substrate indicate that the surface temperature was nearly (within  $\pm 0.5$  °C) uniform.

We carried out a sequence of measurements to determine the temperature of the thermoelectric unit – polycarbonate interface ( $T_i$ ) as a function of the time ( $t$  in s) and the power ( $P$  in W) supplied to the thermoelectric unit. The time was measured from the instant when the thermoelectric unit was turned on. The temperature of the thermoelectric unit-polycarbonate interface at time zero and the temperature of the heat sink at all times were approximately 25°C (the room temperature). The data was correlated (within  $\pm 1$  °C) in the form:

$$T_i = 25 - \left\{ 27 + 44 \exp\left[-\frac{1}{0.7(P + 0.4)}\right] \right\} \exp\left[-\frac{1}{0.7(t + 0.4)}\right].$$

**Fig. 1** depicts the measured (symbols) and correlated (solid lines) temperatures as functions of time.

---

\* Corresponding author, bau@seas.upenn.edu

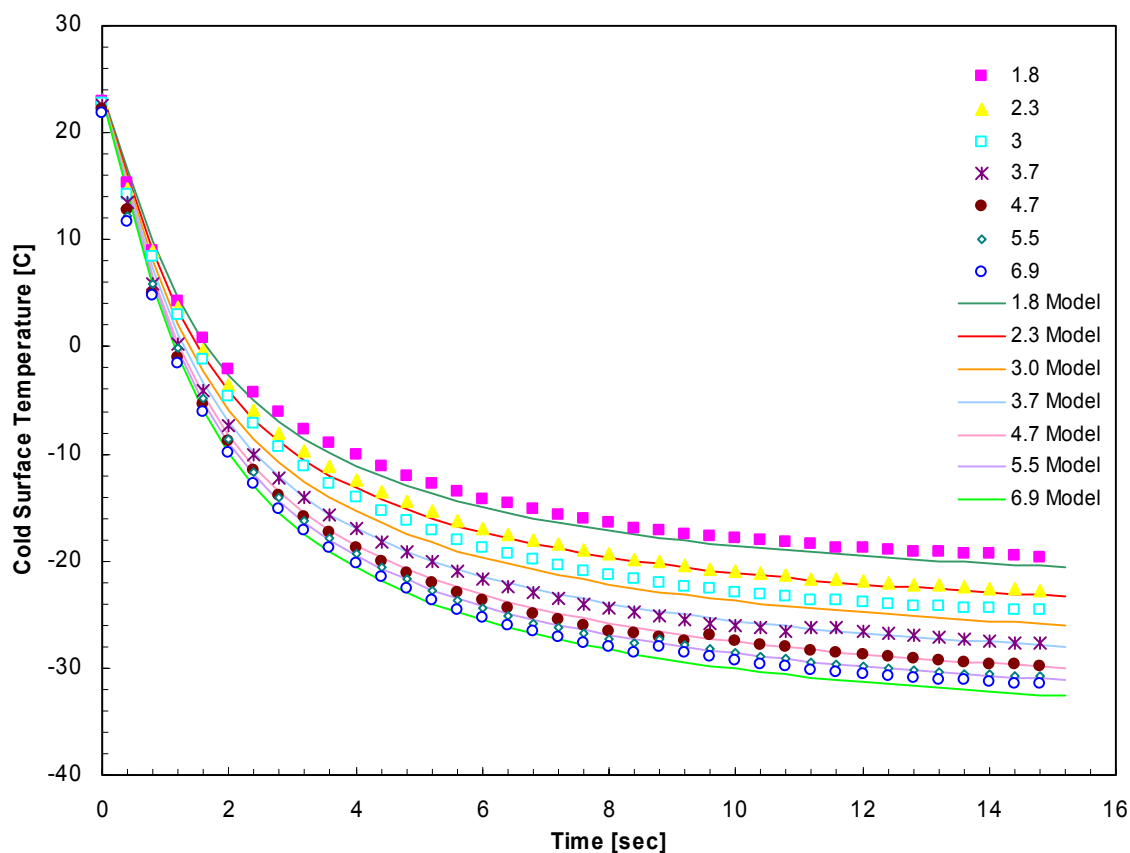

**Fig. 1:** The thermoelectric-polycarbonate interface temperature as a function of time at various thermoelectric power inputs. The symbols and solid lines correspond, respectively, to the experimental data and the correlation.

### 3. Convective Heat Transfer Coefficient

The convective heat transfer coefficient ( $h_a$ ) of the polycarbonate-air interface was determined by solving an inverse problem. A 950 $\mu\text{m}$  polycarbonate sheet was placed over the thermoelectric module (see insert in Fig. 2). The temperatures at different locations on the polycarbonate-air interface were recorded as functions of time when power of 6.9W was applied to the thermoelectric module.

The problem was solved using 3-D finite-elements, heat transfer model with an assumed heat transfer coefficient  $h_a$ . The simulations utilized the empirical formula derived in section 2 to approximate the temperature at the thermoelectric unit-polycarbonate interface. The experimental data was compared with theoretical

predictions and  $h_a$  was varied to minimize the discrepancy between the experimental data and the theoretical predictions. The optimal heat transfer coefficient  $h_a \sim 47.5 \text{ W/k-m}^2$ . Fig. 2 depicts the measured (symbols) and predicted (solid lines) temperatures at various locations along the polycarbonate surface as functions of time.

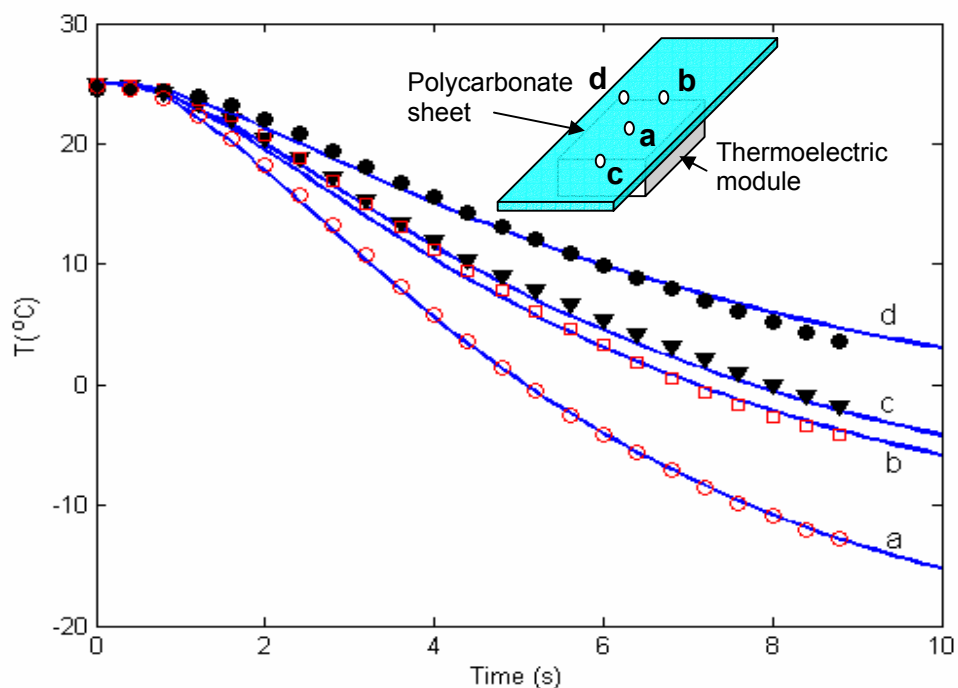

**Fig. 2:** The measured (symbols) and predicted (solid lines) temperatures at various locations on the polycarbonate surface as functions of time when the heat transfer coefficient  $h_a \sim 47.5 \text{ W/k-m}^2$
